# Supplementary material
Source: PubMed Central journal article supplement (PMC3666261)
Supplement: Supp_Fig1.pdf [file Supp_Fig1.pdf]

## Supplementary Data

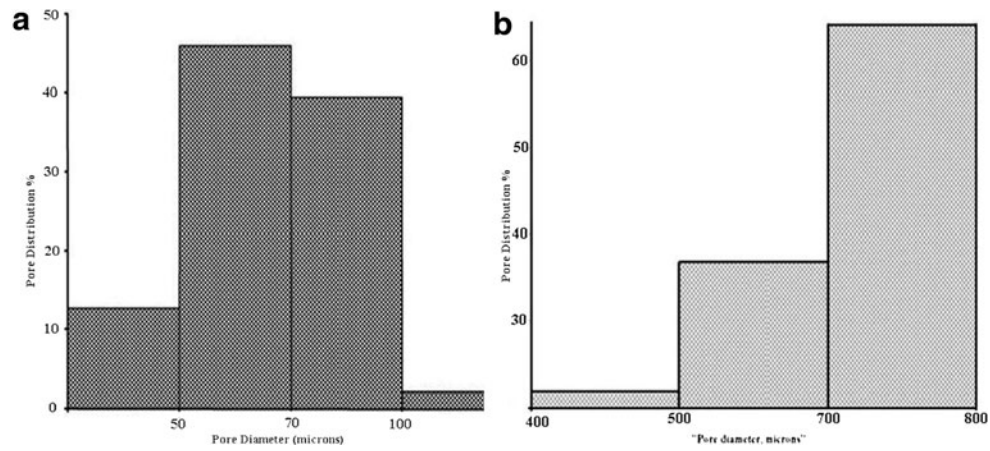

**SUPPLEMENTARY FIG. S1.** (a) Histogram showing the distribution of pore sizes in the porous scaffold from the liquid extrusion porosimetry experiment using Galwick. (b) Histogram showing the distribution of pore sizes in the porous scaffold from the liquid extrusion porosimetry experiment using Water.
