# Supplementary material
Source: PubMed Central journal article supplement (PMC3666261)
Supplement: Supp_Table1.pdf [file Supp_Table1.pdf]

SUPPLEMENTARY TABLE S1. PRIMERS USED FOR THE POLYMERASE CHAIN REACTION TECHNIQUE

|                            | <i>Primer sequences</i>                                                                        | <i>Annealing temperature (°C)</i> |
|----------------------------|------------------------------------------------------------------------------------------------|-----------------------------------|
| GAPDH                      | (Forward) 5'-ATC ACC ATC TTC CAG GAG CG-3'<br>(Reverse) 5'-TAG GAA CAC GGA AGG CCA TG-3'       | 58.5                              |
| $\alpha$ -SMA              | (Forward) 5'-GAT CAC CAT CGG GAA TGA ACG C-3'<br>(Reverse) 5'-CTT AGA AGC ATT TGC GGT GGA C-3' | 57.5                              |
| SM22 $\alpha$              | (Forward) 5'-IGT TCC AGA CTG TTG ACC TC-3'<br>(Reverse) 5'-GTG ATA CCT CAA AGC TGT CC-3'       | 54.9                              |
| Calponin                   | (Forward) 5'-ACA AAA GGA AAC AAA GTC AAT-3'<br>(Reverse) 5'-GGG CAG CCC ATA CAC CGT CAT-3'     | 55.1                              |
| Collagen type 1 $\alpha$ 1 | (Forward) 5'-TAC AGC ACG CTT GTG GAT G-3'<br>(Reverse) 5'-TTG GGA TGG AGG GAG TTT A-3'         | 55                                |
| Tropoelastin               | (Forward) 5'-GTC AGA GGT CAA GGT CTA GG-3'<br>(Reverse) 5'-TCA GTC TAG ACA TGC AAC AC-3'       | 48                                |
